# Supplementary material for: Frontotemporal dementia presentation in patients with heterozygous p.H157Y variant of TREM2
Source: PubMed Central journal article supplement — J Med Genet. 2023 Feb 22;60(9):894–904. doi: 10.1136/jmg-2022-108627 (PMC10447405; doi:10.1136/jmg-2022-108627), 2023-02-22
Supplement: jmg-2022-108627supp001.pdf [file jmg-2022-108627supp001.pdf]

## Supplementary Information

### Frontotemporal dementia presentation in patients with heterozygous p.H157Y variant of *TREM2*

#### S1. Materials and Methods

##### Patients recruitment

##### Study 1

The two cases (patient 1 and patient 2) with a heterozygous p.H157Y variant (*TREM2* group) were diagnosed with bvFTD and presented a similar profile of executive dysfunction and abnormal behavior characterized by apathy, disinhibition, and strikingly affective exaltation symptoms.

Five healthy, right-handed males were recruited as a healthy control group (HC). Participants in this group were matched for sex, age, and education (mean age = 61.34 years, SD=3.9; mean years of formal education=11.3; SD=2.9) to patients 1 and 2 of the *TREM2* group. HC subjects had no history of neurological or psychiatric conditions. The second group of five male sporadic bvFTD patients with neither genetic *TREM2* variants nor family antecedents were recruited (Ng-FTD group). This group was also matched for sex, age, and education (mean age=62.81 years, SD=6.1; mean years of formal education=10.61; SD=3.7) to patients 1 and 2 of the *TREM2* group and HC.

##### Study 2

The Mexican origin case (patient 3), with a heterozygous p.H157Y variant, presented a similar profile of executive dysfunction and abnormal behavior characterized by apathy and disinhibition and later developed MND.

A group of eleven male FTD-MND patients with neither genetic *TREM2* variants nor family antecedents were recruited (Ng-FTD-MND group). All ADSP sample phenotype and demographic data were obtained from dbGAP.

## **Neuropsychological assessment. Study 1**

### **General cognitive assessment**

The general cognitive states of the TREM2 cases and subjects in both control groups were assessed using the Montreal Cognitive Assessment (MoCA)<sup>1</sup>. This test comprises an assessment of short-term memory, visuo-spatial/executive skills (including alteration, phonetic fluency, and abstraction), attention, working memory, language, and orientation. The maximum score is 30 points; a score of 25 or below indicates impairment.

### **Executive functioning**

Executive functions were assessed through the Ineco Frontal Screening (IFS) battery<sup>2</sup>, a sensitive tool for neurodegenerative disease assessment<sup>3,4</sup>. This test includes eight tasks: (i) motor programming (Luria series, ‘fist, edge, palm’); (ii) conflicting instructions (hitting the table once when the administrator hits it twice or hitting it twice when the administrator hits it only once); (iii) motor inhibitory control; (iv) numerical working memory (backward digit span); (v) verbal working memory (months backwards); (vi) spatial working memory (modified Corsi tapping test); (vii) abstraction capacity (inferring the meaning of proverbs); and (viii) verbal inhibitory control (modified Hayling test).

### **Hayling test**

As a complementary measure for assessing inhibitory control in all groups, we used the extended version of the Hayling test<sup>5</sup>. This test has been used to measure verbal inhibitory control. It has proven to be sensitive to verbal disinhibition in patients with neurodegenerative disorders<sup>6,7</sup>.

### **Behavioral changes**

Behavioral symptoms assessed with the Frontal System Behavioral scale (FrSBe) comprised three subfactors tracking changes in apathy, disinhibition, and executive

function impairments<sup>8</sup>. The FrSBe has been validated for tracking behavioral changes in patients with neuropsychiatric diseases<sup>9</sup>.

### **Social cognition task (Theory of mind)**

We employed the Reading the Mind in the Eyes Test (RMET)<sup>10</sup> to assess the emotional inference of the theory of mind. The RMET is a validated, computerized test in which 36 images are presented, each showing the region of the face from midway along the nose to just above the eyebrows. The participant is forced to choose which of four words best describes what the person in the picture is thinking or feeling. The RMET has been previously used to assess social cognitive functioning in patients with bvFTD<sup>6,7</sup>.

## **S2. Materials and Methods**

### **Neuropsychological assessment. Study 2**

#### **General cognitive assessment**

The general cognitive states were assessed using the Montreal Cognitive Assessment (MoCA)<sup>1</sup>. The maximum score is 30 points; a score of 25 or below indicates impairment.

#### **Executive Functioning**

To assess the executive frontal functions the participant was administered with the Stroop task<sup>11</sup>. This task particularly tracks mental speed, selective attention, and inhibitory control.

#### **Behavioral Changes**

To assess behavioral changes the participant was assessed with the Neuropsychiatric Inventory<sup>12,13</sup> (NPI). The NPI encompasses an assessment of delusions, hallucinations, conduct and sleep problems, depression, anxiety, and changes in eating patterns in dementia<sup>7</sup>.

#### **Social Changes**

We assessed the presence of social norms difficulties in the patient by tracking the particular items tracking changes in social behavior in the domain of disinhibition of the NPI<sup>12,13</sup>. Those changes include a loss of social norms in the social context, mocking others in public, speaking with strangers in familial ways and giving them hugs.

### **S3. Materials and Methods**

#### **Neuropsychological assessment. Study 1 and 2**

##### **Behavioral single-case analysis**

To compare the neuropsychological performance of patients in study 1 and 2 and respective controls. Thus, in study 1 the two TREM2 cases were compared with a group of Ng-FTD patients and with a group of HC. In study 2, the case 3 were compared with a group of Ng-FTD-MND patients collected in the U.S and with a group of Ng-FTD patients collected in Colombian. To run comparisons between groups, we used the modified one-tailed Crawford's test<sup>14,15</sup>. This methodology allows for the assessment of significance through comparison of multiple individuals' test scores with values derived from small samples. This modified test presents low values of type I error and is more robust for non-normal distributions; it has been reported in recent single case studies<sup>6,16,17</sup>. Because we are reporting case studies, only values with  $p < .05$  were considered statistically significant in all comparisons. Effect sizes obtained using the same methods are reported as point estimates (zcc as effect size for the modified t-test with covariate analysis)<sup>18</sup>.

### **S4. Materials and Methods**

#### **Genetic analysis. Study 1 and 2**

##### **Sequencing Alignment and Variant Calling**

Paired-end reads were aligned to the GRCh37 reference human genome using Burrows-Wheeler Alignment Tool (BWA-MEM version 0.7.8) <sup>19</sup>. The SAM files were processed using Genome Analysis Toolkit (GATK) best-practices pipeline that includes marking of duplicate reads using Picard tools (v1.83), local realignment around indels, and base recalibration via GATK (v3.2.2) <sup>20</sup>. Variant calling and small INDELs were performed using GATK HaplotypeCaller.

The functional impact of variants was evaluated using combine prediction models using Polymorphism Phenotyping v2 (PolyPhen-2) <sup>21</sup>, MutationTaster <sup>22</sup>, Provean <sup>23</sup>, and Genomic Evolutionary Rate Profiling (GERP++) <sup>24</sup>. Finally, variants were compared with the allelic frequency reported in Latin individuals in the 1000 Genomes Project database using a chi-square test with a 95% confidence level <sup>25</sup>. For expected values below 5, Fisher's exact test was used.

## **S5. Materials and Methods**

### **Structural brain measures. Study 1**

#### **Imaging recordings**

TREM2 cases, HC, and Ng-FTD groups were scanned in a Philips Achieva 3 T Scanner with a 16-channel SENSE antenna. The anatomical and 3D T1-weighted images were recorded with the following parameters: repetition time = 7.9 ms, echo time = 3.8 ms, ACQ matrix 220 × 220 pixels, voxel size 0.5 × 0.5 × 0.5 mm, 310 sections.

## **S6. Materials and Methods**

### **Structural brain measures. Study 2**

#### **Imaging recordings**

TREM2 and Ng-FTD-MND cases image acquisitions were obtained on either a 1.5T, 3T, or 4T scanner, following previous procedures<sup>26,27</sup>. The first available MRI acquisition was used for each patient. Acquisition was performed with the Magnetom VISION system (Siemens, Iselin, NJ). A volumetric magnetization prepared rapid gradient-echo MRI (MPRAGE, TR/TE/TI = 10/4/300 milliseconds) was used to obtain T1-weighted images of the entire brain, 15-degree flip angle, coronal orientation perpendicular to the double spin-echo sequence,  $1.0 \times 1.0 \text{ mm}^2$  in-plane resolution and 1.5mm slab thickness.

## **S7. Materials and Methods**

### **Structural brain measures. Study 1 and 2**

#### **Data analysis of Neuroimaging**

Images were preprocessed using the DARTEL Toolbox, in accordance with previously described procedures<sup>28</sup>. Then, modulated 12-mm full-width half-maximum kernel-smoothed<sup>29</sup> images were normalized to the MNI space and analyzed through general linear models for second level analyses on SPM-8 software. To explore regional gray matter (GM) reduction in the cases relative to control groups in two studies, we performed two-sample tests, including total intracranial volume as a confounding covariate ( $p < 0.001$ , uncorrected, extent threshold = 50 voxels). Given the sample size and the exploratory nature of our study, this threshold avoids detrimental effects of liberal primary thresholds on false positives. Explicit recommendations based on neuroimaging simulations suggest a primary  $p < .001$  as a default lower limit and stringent primary thresholds or correction methods only for highly powered studies<sup>30</sup>. Similarly, other simulations<sup>31</sup> suggest even more liberal uncorrected thresholds ( $p < .005$  with an extent threshold of 20 voxels) to produce a desirable balance between Types I and II error rates that may be comparable to an FDR correction of  $p = .05$ <sup>31</sup>. Moreover, this uncorrected statistical threshold is commonly used in previous Voxel-based morphometry (VBM)<sup>32-</sup>

<sup>35</sup> studies. Furthermore, we employed a large voxel extent threshold (50 voxels) to avoid the emergence of false positive or spurious results, as it occurs with more lenient ones – e.g., 10 voxels; for more details see explicit suggestions from the Organization for Human Brain Mapping (OHBM)<sup>36</sup>.

## **S8. Materials and Methods**

### **Gene expression and atrophy pattern Study 1 and 2**

To establish the potential link between the atrophy pattern of each case and the *TREM2* gene expression, we calculated their overlap using data from the Allen Human Brain database <sup>37</sup>. We established the localization of the gene (in MNI coordinates) from a healthy donor with demographic characteristics like those of our cases [specimen name: H0351.1009 (57 years-old, male, white); probe name: A\_23\_P167941]. As in previous reports <sup>38,39</sup>, five-mm radius spherical ROIs were constructed with each coordinate to create the gene expression map. We reported regions in which the overlap covered at least 50 voxels.

## **S9. Supplementary Results**

### Neuropsychological assessment

#### Study 1

##### General cognitive state

In the MoCA, Case 1 and Case 2 exhibited significantly lower scores than both HCs (Case 1  $t = -5.903$ ,  $p = .0003$ ,  $zcc = -6.26$ , Case 2  $t = -2.983$ ,  $p = .042$ ,  $zcc = -4.12$ ) and the Ng-FTD group ( $t = -3.32$ ,  $p = .001$ ,  $zcc = -4.41$ ). Additionally, Ng-FTD presented significantly lower scores than HC in MoCA scores ( $t = -4.572$ ,  $p = .001$ ,  $zcc = -4.84$ ) (Table 2).

##### Executive functions

Both TREM2 cases showed lower scores on total IFS than HC (Case 1  $t = -8.16$ ,  $p = .0009$ ,  $zcc = -5.12$ ; Case 2  $t = -6.24$ ,  $p = .0001$ ,  $zcc = -5.75$ ) and Ng-FTD group (Case 1  $t = -3.86$ ,  $p = .009$ ,  $zcc = -3.11$ ; Case 2  $t = -2.45$ ,  $p < .05$ ,  $zcc = -2.92$ ). In addition, TREM2 cases exhibited lower Hayling scores than HC (Case 1  $t = -2.65$ ;  $p < .05$ ,  $zcc = -4.11$ ; Case 2  $t = -2.89$ ;  $p < .05$ ,  $zcc = -4.22$ ). No differences were observed between TREM2 cases and the Ng-FTD group in Hayling scores (Table 2).

#### Behavioral changes

TREM2 cases showed significantly higher scores in total FrSBe than HC (Case 1  $t = 48.78$ ,  $p = .00009$ ,  $zcc = 6.34$ ; Case 2  $t = 53.18$ ,  $p = .00009$ ,  $zcc = -7.46$ ). Case 2 exhibited lower total FrSBe scores than Ng-FTD group ( $t = 2.29$ ,  $p < .05$ ,  $zcc = 2.11$ ); no differences were observed between Case 1 and the Ng-FTD group. Individualized analyses on each FrSBe subfactor revealed higher scores for TREM2 cases compared to HC (Apathy: Case 1  $t = 17.11$ ,  $p = .009$ ,  $zcc = 4.11$ ; Case 2  $t = 13.18$ ,  $p = .009$ ,  $zcc = 4.44$ ; Disinhibition: Case 1  $t = 58.18$ ,  $p = .0009$ ,  $zcc = 6.14$ ; Case 2  $t = 69.19$ ,  $p = .0009$ ,  $zcc = 6.21$ ; Executive Functions: Case 1  $t = 65.16$ ,  $p = .0009$ ,  $zcc = 6.22$ ; Case 2  $t = 69.99$ ,  $p = .0009$ ,  $zcc = 6.56$ ). Analyses also revealed higher scores in disinhibition for both TREM2 cases compared to Ng-FTD group (Case 1  $t = 58.18$ ,  $p = .0009$ ,  $zcc = 6.14$ ; Case 2  $t = 69.19$ ,  $p = .0009$ ,  $zcc = 6.21$ ). No other contrast produced significant results (Table 2).

#### Social cognition

Both TREM2 cases attained significantly lower scores for social cognition (RMET) compared to HC (Case 1  $t = -2.78$ ,  $p < .05$ ,  $zcc = -3.34$ ; Case 2  $t = -3.18$ ,  $p < .05$ ,  $zcc = -4.13$ ). No differences were observed when TREM2 cases were compared to the Ng-FTD group (Table 2).

#### Study 2

##### General cognitive state

In the MoCA, Case 3 did not exhibit significant differences when compared with Ng-FTD-MND (Case 3  $t = 0.21$ ,  $p = .80$ ,  $z_{cc} = 0.01$ ) nor with the Ng-FTD group (Case 3  $t = 0.87$ ,  $p = .22$ ,  $z_{cc} = 0.02$ ) (Table 2).

#### Executive functions

Case 3 showed lower scores on the total of correct trials in Stroop task compared to Ng-FTD-MND cases (Case 3  $t = 3.99$ ,  $p < .05$ ,  $z_{cc} = -4.11$ ). No other contrasts reached significant results (Table 2).

#### Behavioral changes

Case 3 showed significantly higher scores on the total scores of the NPI than Ng-FTD-MND cases (Case 3  $t = 3.83$ ,  $p < .05$ ,  $z_{cc} = -3.71$ ). Moreover, analyzing the NPI sub-scores, the patient exhibited worst scores of agitation (Case 3  $t = 2.79$ ,  $p < .05$ ,  $z_{cc} = -2.91$ ), apathy (Case 3  $t = 3.29$ ,  $p < .05$ ,  $z_{cc} = -3.32$ ), disinhibition (Case 3  $t = 2.30$ ,  $p < .05$ ,  $z_{cc} = -2.29$ ), motor problems (Case 3  $t = 2.55$ ,  $p < .05$ ,  $z_{cc} = -2.79$ ), sleep disturbances (Case 3  $t = 3.22$ ,  $p < .05$ ,  $z_{cc} = -3.22$ ), and eating habits (Case 3  $t = 3.70$ ,  $p < .05$ ,  $z_{cc} = -3.41$ ). No other contrasts reached significant results (Table 2).

#### Social changes

Case 3 showed significantly higher scores on the items tracking social norms (NPI disinhibition score) than Ng-FTD-MND cases (Case 3  $t = 3.07$ ,  $p < .05$ ,  $z_{cc} = -3.22$ ) (Table 2).

**Supplementary Table 1. Brain regions (local maxima) showing significant atrophy in Case 1**

| Contrast       | Region                     | Cluster $k$ | x   | y   | z  | Peak $t$ | Peak $z$ |
|----------------|----------------------------|-------------|-----|-----|----|----------|----------|
| Case 1<br>< HC | R supplementary motor area | 1834        | 6   | 12  | 61 | 70.87    | 5.72     |
|                | L cingulate gyrus          | 569         | -4  | -30 | 43 | 52.07    | 5.45     |
|                | R rolandic operculum       | 342         | 46  | 3   | 9  | 48.79    | 5.40     |
|                | L middle temporal gyrus    | 186         | -44 | -64 | 9  | 35.72    | 5.11     |

|                               |                                         |      |     |     |     |       |      |
|-------------------------------|-----------------------------------------|------|-----|-----|-----|-------|------|
|                               | R cerebellum                            | 856  | 45  | -46 | -27 | 32.70 | 5.03 |
|                               | R insula                                | 224  | 26  | 24  | -8  | 24.02 | 4.72 |
|                               | L supramarginal gyrus                   | 80   | -52 | -48 | 33  | 21.40 | 4.60 |
|                               | L insula                                | 442  | -38 | -33 | -17 | 18.09 | 4.43 |
|                               | L fusiform gyrus                        | 103  | -33 | -55 | -12 | 17.88 | 4.42 |
|                               | L postcentral gyrus                     | 52   | -24 | -34 | 72  | 16.63 | 4.34 |
|                               | R vermis                                | 53   | 3   | -82 | -24 | 16.56 | 4.33 |
|                               | R parietal superior lobule              | 57   | 18  | -69 | 61  | 14.41 | 4.18 |
|                               | L cuneus                                | 57   | -12 | -78 | 6   | 13.63 | 4.12 |
|                               | L paracentral lobule                    | 94   | -6  | -19 | 55  | 11.80 | 3.95 |
|                               | R inferior temporal gyrus               | 131  | 64  | -54 | -9  | 10.66 | 3.83 |
|                               | L middle frontal gyrus                  | 61   | -32 | 45  | 12  | 8.29  | 3.53 |
|                               | L postcentral gyrus                     | 196  | -39 | -34 | 52  | 8.05  | 3.49 |
|                               | L postcentral gyrus                     | 1834 | -27 | -37 | 55  | 7.83  | 3.46 |
| Case 1<br>< bvFTD<br>controls | R middle frontal gyrus/superior orbital | 59   | 24  | 45  | -12 | 34.99 | 5.09 |
|                               | L middle frontal gyrus/BA9              | 82   | -36 | 12  | 37  | 23.56 | 4.70 |
|                               | R precentral gyrus                      | 95   | 40  | -1  | 48  | 20.78 | 4.57 |
|                               | L middle frontal gyrus                  | 94   | -34 | 32  | 27  | 17.01 | 4.36 |
|                               | L middle frontal gyrus/BA8              | 64   | -30 | 36  | 48  | 10.30 | 3.79 |
|                               | L fusiform gyrus                        | 56   | -27 | -48 | -8  | 9.16  | 3.65 |
|                               | L fusiform gyrus                        |      | 24  | 45  | -12 | 34.99 | 5.09 |
|                               | R middle frontal gyrus/superior orbital | 59   | -36 | 12  | 37  | 23.56 | 4.70 |
|                               | L middle frontal gyrus/BA9              | 82   | 40  | -1  | 48  | 20.78 | 4.57 |
|                               | R precentral gyrus                      | 95   | -34 | 32  | 27  | 17.01 | 4.36 |
|                               | L middle frontal gyrus                  | 94   | -30 | 36  | 48  | 10.30 | 3.79 |
|                               | L supramarginal gyrus                   | 64   | -27 | -48 | -8  | 9.16  | 3.65 |
|                               | R cerebellum                            | 56   | 24  | 45  | -12 | 34.99 | 5.09 |
|                               | R fusiform gyrus                        |      | -36 | 12  | 37  | 23.56 | 4.70 |
|                               | R transverse temporal gyrus/BA 42       | 59   | 40  | -1  | 48  | 20.78 | 4.57 |
|                               | L calcarine                             | 82   | -34 | 32  | 27  | 17.01 | 4.36 |

|  |                    |    |     |    |    |       |      |
|--|--------------------|----|-----|----|----|-------|------|
|  | R precentral gyrus | 95 | -30 | 36 | 48 | 10.30 | 3.79 |
|--|--------------------|----|-----|----|----|-------|------|

L: Left; R: Right

### Supplementary Table 2 Brain regions (local maxima) showing significant atrophy in Case 2

| Contrast       | Region                                     | Cluster <i>k</i> | x   | y   | z   | Peak <i>t</i> | Peak <i>z</i> |
|----------------|--------------------------------------------|------------------|-----|-----|-----|---------------|---------------|
| Case 2<br>< HC | L parietal inferior lobule                 | 1408             | -46 | -36 | 42  | 241.10        | 6.68          |
|                | R anterior cingulum                        | 2250             | 3   | 51  | 9   | 95.70         | 5.97          |
|                | L middle temporal gyrus                    | 417              | -44 | -64 | 9   | 85.24         | 5.88          |
|                | L middle frontal gyrus                     | 1206             | -33 | 30  | 30  | 66.92         | 5.67          |
|                | R insula                                   | 6188             | 26  | 23  | -8  | 61.62         | 5.60          |
|                | L middle temporal gyrus                    | 11016            | -38 | 3   | -39 | 57.45         | 5.54          |
|                | L cerebellum                               | 135              | -51 | -51 | -33 | 51.15         | 5.44          |
|                | R calcarine                                | 358              | 15  | -57 | 16  | 48.96         | 5.40          |
|                | R middle frontal gyrus                     | 563              | 39  | 15  | 39  | 29.83         | 4.94          |
|                | R mid cingulum                             | 496              | 8   | -12 | 36  | 20.94         | 4.58          |
|                | L precentral gyrus                         | 237              | -38 | 8   | 37  | 20.00         | 4.53          |
|                | R fusiform gyrus                           | 213              | 30  | -49 | -6  | 16.53         | 4.33          |
|                | L inferior temporal gyrus                  | 89               | -51 | -45 | -15 | 16.40         | 4.32          |
|                | R superior temporal gyrus                  | 986              | 58  | -37 | 9   | 14.90         | 4.22          |
|                | R angular gyrus                            | 144              | 42  | -60 | 40  | 11.01         | 3.87          |
|                | Inferior frontal gyrus/BA46                | 124              | 43  | 44  | 10  | 10.47         | 3.81          |
|                | L precuneus                                | 56               | -9  | -61 | 67  | 10.41         | 3.81          |
|                | R postcentral gyrus                        | 80               | 66  | -13 | 30  | 10.13         | 3.77          |
|                | L superior frontal gyrus                   | 219              | -18 | 50  | 42  | 9.28          | 3.67          |
|                | R parietal superior lobule                 | 145              | 15  | -52 | 66  | 8.74          | 3.60          |
|                | R anterior cingulum                        | 57               | 4   | 23  | -5  | 8.35          | 3.54          |
|                | R postcentral gyrus                        | 72               | 30  | -36 | 46  | 7.77          | 3.45          |
|                | R superior frontal gyrus                   | 102              | -22 | 11  | 48  | 7.67          | 3.43          |
|                | R postcentral gyrus                        | 117              | 60  | -19 | 48  | 7.01          | 3.32          |
|                | R postcentral gyrus                        | 1408             | 54  | -19 | 37  | 6.37          | 3.19          |
| Case 2         | R middle frontal gyrus/superior orbital    | 4441             | 24  | 45  | -12 | 98.64         | 6.00          |
|                | L inferior frontal gyrus/pars triangularis | 1507             | -40 | 26  | 22  | 50.56         | 5.43          |

|                  |                                   |      |     |     |     |       |      |
|------------------|-----------------------------------|------|-----|-----|-----|-------|------|
| < bvFTD controls | L middle frontal gyrus/BA 9       | 287  | -36 | 12  | 37  | 48.27 | 5.39 |
|                  | R precentral gyrus                | 299  | 40  | -1  | 48  | 33.05 | 5.04 |
|                  | R hippocampus                     | 535  | 30  | -27 | -8  | 32.96 | 5.03 |
|                  | L parahippocampal gyrus           | 1333 | -30 | -27 | -17 | 31.37 | 4.99 |
|                  | R middle temporal gyrus           | 980  | 60  | -7  | -9  | 29.26 | 4.92 |
|                  | R superior temporal gyrus         | 1041 | 62  | -39 | 7   | 28.84 | 4.90 |
|                  | L middle temporal gyrus           | 321  | -52 | -49 | 6   | 27.69 | 4.86 |
|                  | L middle frontal gyrus            | 66   | -34 | 59  | 16  | 25.26 | 4.77 |
|                  | L inferior temporal gyrus         | 344  | -68 | -28 | -17 | 20.50 | 4.56 |
|                  | R inferior temporal gyrus/BA 20   | 365  | 38  | -4  | -41 | 19.43 | 4.50 |
|                  | L middle frontal gyrus            | 82   | -27 | 48  | 6   | 16.85 | 4.35 |
|                  | R angular gyrus                   | 181  | 42  | -63 | 42  | 14.91 | 4.22 |
|                  | R middle frontal gyrus            | 172  | 46  | 27  | 43  | 13.65 | 4.12 |
|                  | R superior frontal gyrus/ BA 8    | 183  | -10 | 23  | 43  | 12.63 | 4.03 |
|                  | R middle frontal gyrus            | 51   | 31  | 18  | 40  | 12.38 | 4.01 |
|                  | R anterior cingulum               | 501  | 15  | 44  | -2  | 11.96 | 3.97 |
|                  | R middle frontal gyrus            | 81   | 34  | 12  | 31  | 11.69 | 3.94 |
|                  | L caudate                         | 375  | -14 | 12  | 6   | 11.62 | 3.94 |
|                  | R precuneus                       | 106  | 8   | -42 | 58  | 11.10 | 3.88 |
|                  | R medial frontal gyrus/ BA 10     | 110  | -14 | 45  | 6   | 10.32 | 3.80 |
|                  | L supramarginal gyrus             | 93   | -45 | -49 | 36  | 9.25  | 3.66 |
|                  | R cerebellum                      | 81   | 36  | -40 | -44 | 8.63  | 3.58 |
|                  | R fusiform gyrus                  | 104  | 60  | -4  | -27 | 8.34  | 3.54 |
|                  | R transverse temporal gyrus/BA 42 | 66   | 36  | -28 | 12  | 8.06  | 3.49 |
|                  | L calcarine                       | 75   | -21 | -55 | 9   | 7.87  | 3.46 |
|                  | R precentral gyrus                | 187  | 55  | 3   | 36  | 7.87  | 3.46 |

L: Left; R: Right

**Supplementary Table 3. Brain regions (local maxima) showing significant atrophy in Case 3 compared to Ng-FTD-MND**

| Region            | MNI coordinates |    |    |
|-------------------|-----------------|----|----|
|                   | x               | y  | z  |
| Bilateral caudate | -2/2            | -6 | 18 |

|                    |      |     |    |
|--------------------|------|-----|----|
| Bilateral putamen  | -6/6 | -5  | 21 |
| Bilateral Thalamus | -12  | -18 | 18 |

**Supplementary Table 4. Overlapping brain regions between the *TREM2* gene expression in case 1 and case 2 vs. Donor H0351.1009**

|                             | MNI coordinates |     |     |
|-----------------------------|-----------------|-----|-----|
| Region                      | x               | y   | z   |
| Superior Temporal gyrus     | -59             | -24 | 1   |
| Inferior temporal gyrus     | -50             | -6  | 38  |
| Orbitofrontal cortex        | -48             | 8   | 42  |
| Left superior frontal gyrus | -15             | 59  | 20  |
| Middle frontal gyrus        | 45              | 53  | -7  |
| Precentral gyrus            | -59             | 2   | 37  |
| Fusiform gyrus              | -38             | -58 | -14 |
| Inferior parietal lobule    | -45             | -46 | 53  |
| Left Precuneus              | -25             | -76 | 41  |
| Supramarginal gyrus         | -59             | -47 | 30  |
|                             |                 |     |     |

**Supp Table 5. Overlapping brain regions between the *TREM2* gene expression in case 3 vs. Donor H0351.1009**

|                   | MNI coordinates |    |    |
|-------------------|-----------------|----|----|
| Region            | x               | y  | z  |
| Bilateral caudate | -2/2            | -6 | 18 |
| Bilateral putamen | -6/6            | -5 | 21 |

## References

1. Nasreddine ZS, Phillips NA, Bedirian V, et al. The Montreal Cognitive Assessment, MoCA: a brief screening tool for mild cognitive impairment. *J Am Geriatr Soc.* Apr 2005;53(4):695-699.
2. Torralva T, Roca M, Gleichgerricht E, López P, Manes F. INECO Frontal Screening (IFS): a brief, sensitive, and specific tool to assess executive functions in dementia. *J Int Neuropsychol Soc.* Sep 2009;15(5):777-786.

3. Gleichgerrcht E, Torralva T, Rattazzi A, Marengo V, Roca M, Manes F. Selective impairment of cognitive empathy for moral judgment in adults with high functioning autism. *Soc Cogn Affect Neurosci*. Oct 2013;8(7):780-788.
4. Roca M, Torralva T, Gleichgerrcht E, et al. The role of Area 10 (BA10) in human multitasking and in social cognition: a lesion study. *Neuropsychologia*. Nov 2011;49(13):3525-3531.
5. Bouquet CA, Bonnaud V, Gil R. Investigation of supervisory attentional system functions in patients with Parkinson's disease using the Hayling task. *J Clin Exp Neuropsychol*. Sep 2003;25(6):751-760.
6. Baez S, Manes F, Huepe D, et al. Primary empathy deficits in frontotemporal dementia. *Front Aging Neurosci*. 2014;6:262.
7. Santamaría-García H, Baez S, Reyes P, et al. A lesion model of envy and Schadenfreude: legal, deservingness and moral dimensions as revealed by neurodegeneration. *Brain*. Dec 01 2017;140(12):3357-3377.
8. Carvalho JO, Ready RE, Malloy P, Grace J. Confirmatory factor analysis of the Frontal Systems Behavior Scale (FrSBe). *Assessment*. Oct 2013;20(5):632-641.
9. Santamaria-Garcia H, Reyes P, Garcia A, et al. First Symptoms and Neurocognitive Correlates of Behavioral Variant Frontotemporal Dementia. *J Alzheimers Dis*. Oct 4 2016;54(3):957-970.
10. Baron-Cohen S, Jolliffe T, Mortimore C, Robertson M. Another advanced test of theory of mind: evidence from very high functioning adults with autism or asperger syndrome. *J Child Psychol Psychiatry*. Oct 1997;38(7):813-822.
11. Treisman A, Fearnley S. The Stroop test: selective attention to colours and words. *Nature*. May 03 1969;222(5192):437-439.
12. Cummings JL. The Neuropsychiatric Inventory: Assessing psychopathology in dementia patients. *Neurology*. 1997/05/01 1997;48(Issue 5, Supplement 6):10S-16S.
13. Cummings JL, Mega M, Gray K, Rosenberg-Thompson S, Carusi DA, Gornbein J. The Neuropsychiatric Inventory: comprehensive assessment of psychopathology in dementia. *Neurology*. Dec 1994;44(12):2308-2314.
14. Crawford JR, Garthwaite PH, Howell DC. On comparing a single case with a control sample: an alternative perspective. *Neuropsychologia*. Nov 2009;47(13):2690-2695.
15. Crawford JR, Garthwaite PH. Investigation of the single case in neuropsychology: confidence limits on the abnormality of test scores and test score differences. *Neuropsychologia*. 2002;40(8):1196-1208.
16. Couto B, Sedenio L, Sposato LA, et al. Insular networks for emotional processing and social cognition: comparison of two case reports with either cortical or subcortical involvement. *Cortex*. May 2013;49(5):1420-1434.
17. Straube T, Weisbrod A, Schmidt S, et al. No impairment of recognition and experience of disgust in a patient with a right-hemispheric lesion of the insula and basal ganglia. *Neuropsychologia*. May 2010;48(6):1735-1741.
18. Crawford JR, Garthwaite PH, Porter S. Point and interval estimates of effect sizes for the case-controls design in neuropsychology: rationale, methods, implementations, and proposed reporting standards. *Cogn Neuropsychol*. May 2010;27(3):245-260.
19. Li H, Durbin R. Fast and accurate short read alignment with Burrows-Wheeler transform. *Bioinformatics*. Jul 15 2009;25(14):1754-1760.
20. McKenna A, Hanna M, Banks E, et al. The Genome Analysis Toolkit: a MapReduce framework for analyzing next-generation DNA sequencing data. *Genome Res*. Sep 2010;20(9):1297-1303.
21. Adzhubei IA, Schmidt S, Peshkin L, et al. A method and server for predicting damaging missense mutations. *Nat Methods*. Apr 2010;7(4):248-249.
22. Schwarz JM, Cooper DN, Schuelke M, Seelow D. MutationTaster2: mutation prediction for the deep-sequencing age. *Nat Methods*. Apr 2014;11(4):361-362.

23. Choi Y, Sims GE, Murphy S, Miller JR, Chan AP. Predicting the functional effect of amino acid substitutions and indels. *PLoS One*. 2012;7(10):e46688.
24. Cooper GM, Stone EA, Asimenos G, et al. Distribution and intensity of constraint in mammalian genomic sequence. *Genome Res*. Jul 2005;15(7):901-913.
25. Auton A, Brooks LD, Durbin RM, et al. A global reference for human genetic variation. *Nature*. Oct 01 2015;526(7571):68-74.
26. Vinceti G, Olney N, Mandelli ML, et al. Primary progressive aphasia and the FTD-MND spectrum disorders: clinical, pathological, and neuroimaging correlates. *Amyotroph Lateral Scler Frontotemporal Degener*. May 2019;20(3-4):146-158.
27. Gorno-Tempini ML, Dronkers NF, Rankin KP, et al. Cognition and anatomy in three variants of primary progressive aphasia. *Ann Neurol*. Mar 2004;55(3):335-346.
28. Ashburner J, Friston KJ. Voxel-based morphometry--the methods. *Neuroimage*. Jun 2000;11(6 Pt 1):805-821.
29. Good CD, Johnsrude IS, Ashburner J, Henson RN, Friston KJ, Frackowiak RS. A voxel-based morphometric study of ageing in 465 normal adult human brains. *Neuroimage*. Jul 2001;14(1 Pt 1):21-36.
30. Woo C-W, Krishnan A, Wager TD. Cluster-extent based thresholding in fMRI analyses: pitfalls and recommendations. *Neuroimage*. 2014;91:412-419.
31. Lieberman MD, Cunningham WA. Type I and Type II error concerns in fMRI research: re-balancing the scale. *Social cognitive affective neuroscience*. 2009;4(4):423-428.
32. García-Cordero I, Sedeño L, de la Fuente L, et al. Feeling, learning from and being aware of inner states: interoceptive dimensions in neurodegeneration and stroke. *Philos T R Soc B*. 2016;371(1708).
33. Santamaria-Garcia H, Baez S, Reyes P, et al. A lesion model of envy and Schadenfreude: legal, deservingness and moral dimensions as revealed by neurodegeneration. *Brain*. Nov 02 2017.
34. de la Fuente A, Sedeño L, Vignaga SS, et al. Multimodal neurocognitive markers of interoceptive tuning in smoked cocaine. *Neuropsychopharmacology*. 2019;44(8):1425-1434.
35. Seden L, Piguet O, Abrevaya S, et al. Tackling variability: A multicenter study to provide a gold-standard network approach for frontotemporal dementia. *Human brain mapping*. 2017;38(8):3804-3822.
36. Nichols TE, Das S, Eickhoff SB, et al. Best practices in data analysis and sharing in neuroimaging using MRI. *Nature neuroscience*. Feb 23 2017;20(3):299-303.
37. Jones AR, Overly CC, Sunkin SM. The Allen Brain Atlas: 5 years and beyond. *Nat Rev Neurosci*. Nov 2009;10(11):821-828.
38. Baez S, Couto B, Herrera E, et al. Tracking the Cognitive, Social, and Neuroanatomical Profile in Early Neurodegeneration: Type III Cockayne Syndrome. *Front Aging Neurosci*. 2013;5:80.
39. García AM, Abrevaya S, Kozono G, et al. The cerebellum and embodied semantics: evidence from a case of genetic ataxia due to STUB1 mutations. *J Med Genet*. Feb 2017;54(2):114-124.
